## Contents

Proceedings, International Symposium on Schizophrenia Bern 2005 (ISSB 2005):  
“Psychotherapy of Schizophrenia Patients: Basis, Spectrum, Evidence and Perspectives”  
Edited by Wolfgang Tschacher, Volker Roder, and Hans D. Brenner

|                                                                                                                                              |      |
|----------------------------------------------------------------------------------------------------------------------------------------------|------|
| <b>Introduction to Psychotherapy of Schizophrenic Patients: Basis, Spectrum, Evidence, and Perspectives</b> .....                            | i    |
| <i>Wolfgang Tschacher</i>                                                                                                                    |      |
| <b>Editorial: The Significance of Psychotherapy in the Age of Neuroscience</b> .....                                                         | S10  |
| <i>Hans Dieter Brenner, Volker Roder, and Wolfgang Tschacher</i>                                                                             |      |
| <b>A Neuropsychiatric Model of Biological and Psychological Processes in the Remission of Delusions and Auditory Hallucinations</b> .....    | S113 |
| <i>Mark van der Gaag</i>                                                                                                                     |      |
| <b>Perception of Causality in Schizophrenia Spectrum Disorder</b> .....                                                                      | S106 |
| <i>Wolfgang Tschacher and Zeno Kupper</i>                                                                                                    |      |
| <b>The Functional Significance of Social Cognition in Schizophrenia: A Review</b> .....                                                      | S44  |
| <i>Shannon M. Couture, David L. Penn, and David L. Roberts</i>                                                                               |      |
| <b>Cognitive Predictors of Social Functioning Improvements Following Cognitive Remediation for Schizophrenia</b> .....                       | S123 |
| <i>Clare Reeder, Nicola Smedley, Kate Butt, Diana Bogner, and Til Wykes</i>                                                                  |      |
| <b>Psychoeducation: A Basic Psychotherapeutic Intervention for Patients With Schizophrenia and Their Families</b> .....                      | S1   |
| <i>Josef Bäuml, Teresa Froböse, Sibylle Kraemer, Michael Rentrop, and Gabriele Pitschel-Walz</i>                                             |      |
| <b>Cognitive, Emotional, and Social Processes in Psychosis: Refining Cognitive Behavioral Therapy for Persistent Positive Symptoms</b> ..... | S24  |
| <i>Elizabeth Kuipers, Philippa Garety, David Fowler, Daniel Freeman, Graham Dunn, and Paul Bebbington</i>                                    |      |
| <b>Recent Advances in Social Skills Training for Schizophrenia</b> .....                                                                     | S12  |
| <i>Alex Kopelowicz, Robert Paul Liberman, and Roberto Zarate</i>                                                                             |      |
| <b>Efficacy of Psychological Therapy in Schizophrenia: Conclusions From Meta-analyses</b> .....                                              | S64  |
| <i>Mario Pfammatter, Ulrich Martin Junghan, and Hans Dieter Brenner</i>                                                                      |      |
| <b>Integrated Psychological Therapy (IPT) for Schizophrenia: Is It Effective?</b> .....                                                      | S81  |
| <i>Volker Roder, Daniel R. Mueller, Kim T. Mueser, and Hans D. Brenner</i>                                                                   |      |
| <b>The Illness Management and Recovery Program: Rationale, Development, and Preliminary Findings</b> .....                                   | S32  |
| <i>Kim T. Mueser, Piper S. Meyer, David L. Penn, Richard Clancy, Donna M. Clancy, and Michelle P. Salyers</i>                                |      |
| <b>Psychotherapy for Schizophrenia in the Year 2030: Prognosis and Prognostication</b> .....                                                 | S94  |
| <i>William Spaulding and Jeffrey Noltung</i>                                                                                                 |      |

## About the Cover

The cover art titled “Two Angels” is by Suzanne Schneider (courtesy National Alliance for Research on Schizophrenia and Depression Artworks). According to the artist she has been interested in art since she was a little girl. She stated that all her interests are art-oriented except for her love for the Bible. Without her deep religious convictions she feels she would never have made it through the tough times. She has been in the hospital 30 times since she was 18 years old. However, in the last ten years she had had only one episode.
